# Supplementary material
Source: PubMed Central journal article supplement (PMC7609043)
Supplement: mmc1.pdf [file mmc1.pdf]

**Cancer Cell, Volume 38**

## **Supplemental Information**

### **Cancer Care Disparities**

**during the COVID-19 Pandemic:**

### **COVID-19 and Cancer Outcomes Study**

**Andrew L. Schmidt, Ziad Bakouny, Sheena Bhalla, John A. Steinharter, Douglas A. Tremblay, Mark M. Awad, Alaina J. Kessler, Robert I. Haddad, Michelle Evans, Fiona Busser, Michael Wotman, Catherine R. Curran, Brittney S. Zimmerman, Gabrielle Bouchard, Tomi Jun, Pier V. Nuzzo, Qian Qin, Laure Hirsch, Jonathan Feld, Kaitlin M. Kelleher, Danielle Seidman, Hsin-Hui Huang, Heather M. Anderson-Keightly, Sarah Abou Alaiwi, Talia D. Rosenbloom, Penina S. Stewart, Matthew D. Galsky, Toni K. Choueiri, and Deborah B. Doroshov**

**Table S1.** Adjusted odds ratios and 95% confidence intervals from the multivariable logistic regression model.

|                      |                                        | Any decrease in All Visits | Any decrease in In-Person Visits | Any decrease in Telehealth Visits | COVID-19 Diagnosis | Treatment Delays | Delays in Diagnostic Imaging | Change in Treatment Secondary to Pandemic |
|----------------------|----------------------------------------|----------------------------|----------------------------------|-----------------------------------|--------------------|------------------|------------------------------|-------------------------------------------|
|                      | Non-missing (N)                        | 2066                       | 2066                             | 2066                              | 2069               | 2064             | 2039                         | 2068                                      |
| Independent Variable | Levels                                 | aOR (95% CI)               | aOR (95% CI)                     | aOR (95% CI)                      | aOR (95% CI)       | aOR (95% CI)     | aOR (95% CI)                 | aOR (95% CI)                              |
| Race                 | Non-Hispanic White                     | 1 (Ref)                    | 1 (Ref)                          | 1 (Ref)                           | 1 (Ref)            | 1 (Ref)          | 1 (Ref)                      | 1 (Ref)                                   |
|                      | Non-Hispanic Black                     | 1.10 (0.83-1.45)           | 0.93 (0.70-1.23)                 | 0.69 (0.50-0.94)                  | 1.86 (1.10-3.11)   | 1.26 (0.84-1.88) | 0.66 (0.31-1.30)             | 0.85 (0.40-1.68)                          |
|                      | Hispanic                               | 1.34 (1.02-1.77)           | 1.10 (0.83-1.46)                 | 0.71 (0.51-0.98)                  | 3.19 (2.00-5.10)   | 1.53 (1.03-2.26) | 1.51 (0.85-2.59)             | 1.50 (0.79-2.74)                          |
|                      | Other                                  | 1.06 (0.75-1.51)           | 0.93(0.62-1.32)                  | 0.90 (0.60-1.32)                  | 0.25 (0.04-0.84)   | 0.78 (0.41-1.38) | 1.24 (0.57-2.47)             | 1.20 (0.50-2.57)                          |
| Site                 | MSSM                                   | 1 (Ref)                    | 1 (Ref)                          | 1 (Ref)                           | 1 (Ref)            | 1 (Ref)          | 1 (Ref)                      | 1 (Ref)                                   |
|                      | DFCI                                   | 1.16 (0.88-1.53)           | 1.39 (1.06-1.84)                 | 3.18 (2.35-4.35)                  | 0.24 (0.11-0.48)   | 0.31 (0.19-0.51) | 0.49 (0.27-0.90)             | 0.28 (0.12-0.56)                          |
| Tumor Status         | Localized, Locally Advanced, or Stable | 1 (Ref)                    | 1 (Ref)                          | 1 (Ref)                           | 1 (Ref)            | 1 (Ref)          | 1 (Ref)                      | 1 (Ref)                                   |
|                      | Metastatic or Active                   | 1.22 (0.99-1.51)           | 1.33 (1.08-1.64)                 | 1.12 (0.89-1.39)                  | 1.71 (1.06-2.80)   | 0.97 (0.69-1.36) | 1.87 (1.09-3.33)             | 0.54 (0.32-0.91)                          |
|                      | Complete Response or NED               | 0.84 (0.64-1.10)           | 0.81 (0.63-1.06)                 | 0.52 (0.38-0.71)                  | 1.25 (0.70-2.23)   | 0.80 (0.51-1.25) | 2.88 (1.54-5.51)             | 0.37 (0.16-0.77)                          |
| Current Treatment    | No                                     | 1 (Ref)                    | 1 (Ref)                          | 1 (Ref)                           | 1 (Ref)            | 1 (Ref)          | 1 (Ref)                      | 1 (Ref)                                   |
|                      | Yes                                    | 1.76 (1.43-2.17)           | 2.03 (1.65-2.49)                 | 1.56 (1.25-1.96)                  | 1.37 (0.88-2.19)   | 3.04 (2.07-4.58) | 1.34 (0.83-2.20)             | 4.83 (2.32-11.79)                         |
| Main Tumor           | Genitourinary Malignancy               | 1 (Ref)                    | 1 (Ref)                          | 1 (Ref)                           | 1 (Ref)            | 1 (Ref)          | 1 (Ref)                      | Not included (insufficient events)        |
|                      | Breast Malignancy                      | 0.82 (0.57-1.18)           | 0.70 (0.49-1.00)                 | 0.87 (0.56-1.34)                  | 0.60 (0.27-1.32)   | 0.57 (0.32-1.03) | 0.38 (0.15-0.92)             | Not included (insufficient events)        |
|                      | Head and Neck Malignancy               | 1.99 (1.39-2.86)           | 1.44 (1.00-2.07)                 | 0.98 (0.66-1.44)                  | 1.05 (0.33-2.79)   | 0.48 (0.18-1.10) | 1.37 (0.52-3.23)             | Not included (insufficient events)        |
|                      | Hematological Malignancy               | 1.51 (1.09-2.10)           | 1.78 (1.28-2.47)                 | 2.69 (1.88-3.88)                  | 1.71 (0.91-3.35)   | 1.52 (0.93-2.52) | 1.00 (0.50-2.05)             | Not included (insufficient events)        |
|                      | Thoracic Malignancy                    | 2.20 (1.63-2.97)           | 2.08 (1.53-2.86)                 | 1.16 (0.85-1.57)                  | 1.30 (0.59-2.77)   | 1.45 (0.85-2.44) | 2.30 (1.19-4.45)             | Not included (insufficient events)        |
|                      | Gastrointestinal Malignancy            | 1.81 (1.21-2.72)           | 1.71 (1.14-2.58)                 | 1.51 (0.95-2.40)                  | 0.70 (0.28-1.67)   | 0.98 (0.53-1.81) | 0.78 (0.28-1.97)             | Not included (insufficient events)        |
|                      | Solid Tumor                            | 1.27 (0.82-1.95)           | 1.16 (0.75-1.77)                 | 1.13 (0.69-1.84)                  | 0.99 (0.39-2.35)   | 0.74 (0.35-1.50) | 1.31 (0.53-3.08)             | Not included (insufficient events)        |

MSSM; Tisch Cancer Institute, Icahn School of Medicine at Mount Sinai, DFCI; Dana-Farber Cancer Institute, NED; no evaluable disease, aOR; adjusted odds ratio, Ref; reference
